# Supplementary material
Source: Springer Nature journal article supplement (https://www.springermedizin.de/resource/supplementary/12876_2006_185_MOESM1_ESM.pdf/9438876)

## A. Esophageal cancer- squamous cell carcinoma

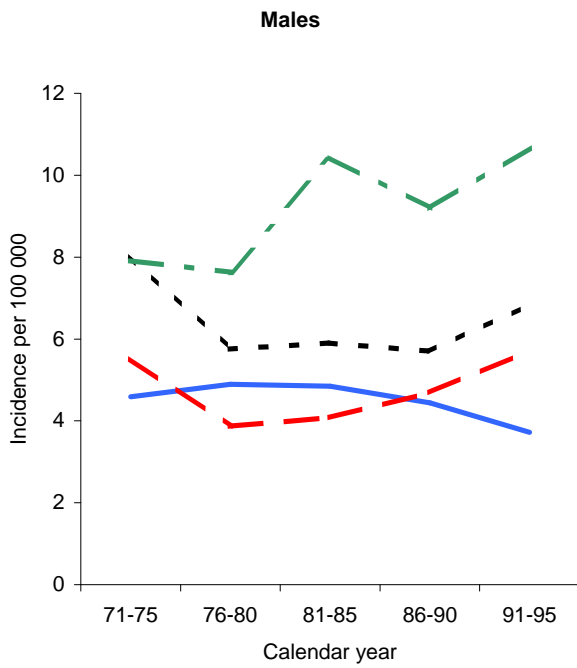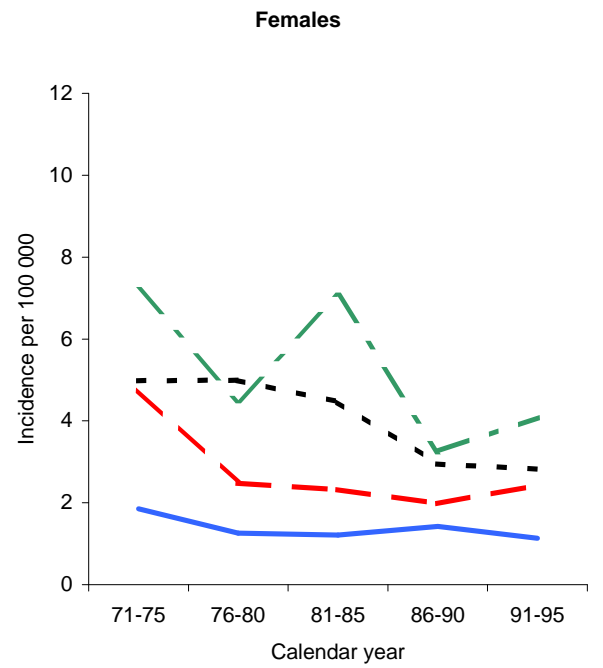

## B. Esophageal cancer- adenocarcinoma

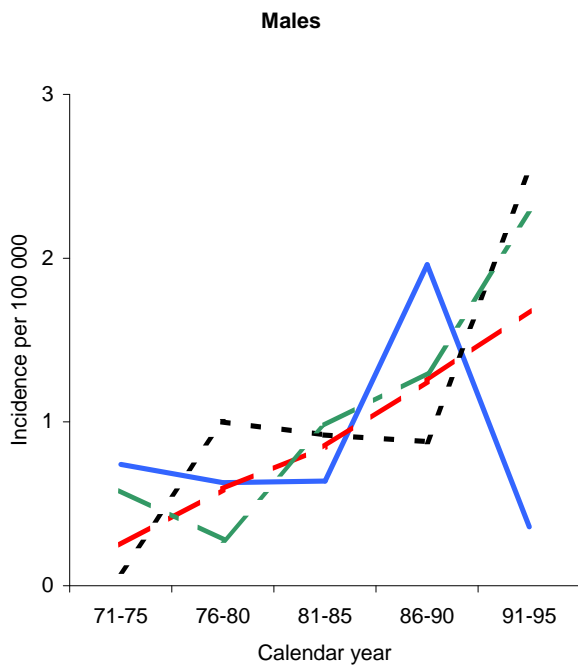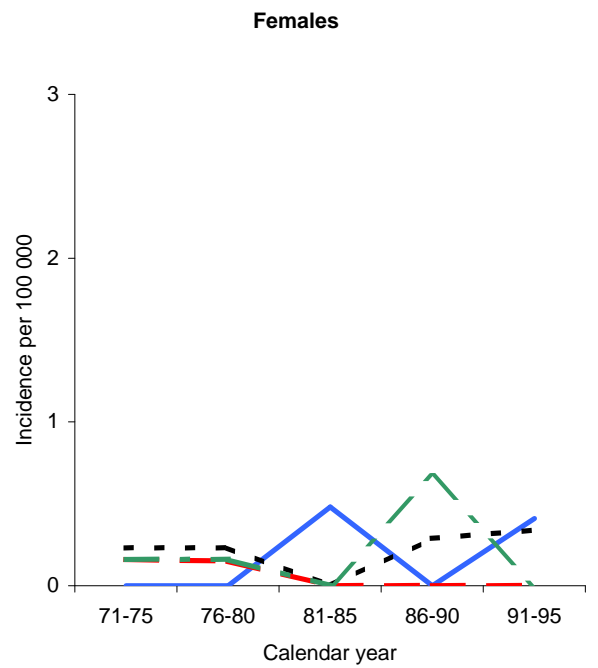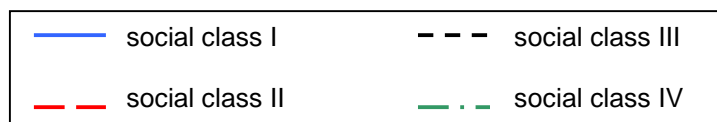

Supplement: MOESM1 [file 9438876]
